# Supplementary material
Source: ML conference proceedings conference paper supplement (https://openreview.net/forum?id=0-0Wk0t6A_Z)
Supplement: supplementary_material [file attachment]

## 1 Appendix

2 The content of appendix is organized as follows:

- 3 • Appendix A provides more details about the generation process of filter bank.
- 4 • Appendix B shows the Pytorch-style code of our proposed ARM.
- 5 • Appendix C conducts evaluations on downstream tasks including object detection and se-
- 6 mantic segmentation. We also include more details about the robustness towards corruptions.

### 7 A Details about the generation process of filter bank

8 In this section, we provide more details about how we generate the filter bank. The filter bank  
9 consists of Gaussian and Difference of Gaussians (DoG) filters. As mentioned, the Gaussian filters  
10 are designed for its widely-adopted ability in anti-aliasing [1, 2] and image enhancement [3], while  
11 Difference of Gaussians can boost the power of edge-aware operations [4].

12 In generating filters, the weights of each  $k \times k$  kernel inside the filter bank are defined according to  
13 the function below:

$$k(x - x_0; \Sigma) = \frac{1}{2\pi|\Sigma|^{\frac{1}{2}}} e^{-\frac{1}{2}(x-x_0)^T \Sigma^{-1}(x-x_0)^T} \quad (1)$$

14 In particular, the weights are generated based on the covariance matrix  $\Sigma$  which can be decomposed  
15 into the equation:

$$\begin{aligned} \Sigma &= \gamma^2 \mathbf{U}_\theta \mathbf{\Lambda} \mathbf{U}_\theta^T, \\ &= \gamma^2 \begin{bmatrix} \cos \theta & -\sin \theta \\ \sin \theta & \cos \theta \end{bmatrix} \begin{bmatrix} \sigma_1^2 & 0 \\ 0 & \sigma_2^2 \end{bmatrix} \begin{bmatrix} \cos \theta & -\sin \theta \\ \sin \theta & \cos \theta \end{bmatrix}^T, \end{aligned} \quad (2)$$

16 where the rotation, scaling, and elongation (ellipticalness) parameters are represented by  $\theta, \gamma$ , and  
17  $\sigma_{1,2}$ , respectively. During each run, we sample these parameters in intervals stochastically. After  
18 generating the covariance matrix  $\Sigma$  for each Gaussian filters, we also sample groups of  $i, j$  to generate  
19 the weights of DoG filters by subtracting the derived Gaussian kernels  $i$  and  $j$ .

20 During our implementations, we find that the results are robust towards different parameters. One  
21 major reason is that the filter bank is redundant and contains enough representation power. When  
22 sampled with different random seeds, the estimator is capable of generating abundant kernels.  
23 However, we also observe the oscillations of accuracy (about 0.5% Top-1 accuracy variance in 10  
24 runs) when the small portion of DoG filters are removed. Consequently, we conjecture that these  
25 edge-preserving DoG kernels also stabilize the optimization process.

### 26 B Pytorch-style Pesudocode of Aliasing Reduction Module

---

#### Algorithm 1 Pytorch-style Pesudocode of ARM for ViT/DeiT

---

```
# Inside the transformer block:
# B: batch size, N: token sizes, C: channel number.
# H' and W': the original spatial sizes of flattened attention maps.
# self.ARM: the proposed Aliasing Reduction Module.
##### Fold the attention back to spatial #####
attention = self.attn(self.norm1(x)) # B, N, C
attention = attention.permute(0,2,1).view(B,C,H',W') # B, C, H', W'
##### Perform anti-aliasing #####
attention = self.ARM(attention)
x = x + self.drop_path(attention.permute(0,2,3,1).view(B, N, C))
x = x + self.drop_path(self.mlp(self.norm2(x)))
return x
```

---

28 To better illustrate our simple yet effective design, we also pseudocode in Pytorch-style. We  
 29 provide both examples for two popular vision transformer structures: ViT[5] (DeiT [6])<sup>1</sup> and Swin  
 30 Transformer [7]<sup>2</sup>, in Algorithm 1 and Algorithm 2.

31 The proposed ARM is versatile with most vision transformer families, by directly anti-aliasing the  
 32 self-attention representations in the transformer blocks. As discussed in Section 3.2, the ARM  
 33 operator can be chosen flexibly among a traditional low-pass filter, e.g. Gaussian filter, a learnable  
 34 convolutional filter, or a pre-defined filter bank. Any mentioned choice could consistently bring some  
 35 improvements to the switchable baselines.

---

**Algorithm 2** Pytorch-style Pseudocode of ARM for Swin Transformer

---

```
# Inside the Swin Transformer Block:
# B: batch size, nW: number of windows , C: channel number, H, W: the original size.
# window_size, window_reverse: the size of each window, and the function to reverse windows back.
# self.ARM: the proposed Aliasing Reduction Module.
##### Compute window attention and merge the windows#####
attn_windows = self.attn(x_windows, mask=self.attn_mask) # nW*B, window_size*window_size, C
attn_windows = attn_windows.view(-1, self.window_size, self.window_size, C)
##### Perform anti-aliasing #####
shifted_x = self.ARM(window_reverse(attn_windows, self.window_size, H, W)) # B H W C
##### Reverse cyclic shift(Omitted in pseudocode) #####
x = roll(shifted_x)
x = shortcut + self.drop_path(x)
x = x + self.drop_path(self.mlp(self.norm2(x)))
return x
```

---

38 **C Downstream Task Evaluations**

38 To better demonstrate the effectiveness of the proposed method, we further conduct evaluations  
 39 on downstream tasks including object detection and semantic segmentation. We choose a strong  
 40 architecture Swin Transformer [7] as our baseline.

41 **Object Detection.** We perform object detection experiments on COCO 2017 [8] dataset, which  
 42 contains 118K images for training, 5K images for validation, and 20K images for test-dev. We  
 43 consider two widely-adopted object detection frameworks including Mask R-CNN [9] and Cascade  
 44 Mask R-CNN [10] in mmdetection [11]. Following [7], we keep the consistent settings including  
 45 multi-scale training, AdamW optimizer (with an initial learning rate of 0.0001, weight decay of  
 46 0.05, and batch size of 16). We adopt both 1x (12 epochs) and 3x (36 epochs) schedule and similar  
 47 hyperparameter settings from the open-source implementation<sup>3</sup>.

| Method                  | Backbone            | Pre-trained | LR Schedule | Box mAP     | Mask mAP    |
|-------------------------|---------------------|-------------|-------------|-------------|-------------|
| Mask R-CNN [9]          | Swin-T              | ImageNet-1k | 1x          | 43.7        | 39.8        |
|                         | <b>Swin-T w ARM</b> | ImageNet-1k | 1x          | <b>44.8</b> | <b>40.5</b> |
|                         | Swin-T              | ImageNet-1k | 3x          | 46.0        | 41.6        |
|                         | <b>Swin-T w ARM</b> | ImageNet-1k | 3x          | <b>46.7</b> | <b>42.1</b> |
| Cascade Mask R-CNN [10] | Swin-T              | ImageNet-1k | 1x          | 48.1        | 41.7        |
|                         | <b>Swin-T w ARM</b> | ImageNet-1k | 1x          | <b>48.9</b> | <b>42.3</b> |

Table 1: Results on COCO object detection and instance segmentation. The baseline architecture follows Swin-T. The models integrated with our proposed ARM are shown in bold font.

48 From Table 1, the proposed ARM enhances both baselines consistently in 1x and 3x schedule without  
 49 bells and whistles. The results verify the effectiveness of ARM on downstream tasks.

50 **Semantic Segmentation.** We also evaluate our method on semantic segmentation, utilizing the  
 51 widely-used ADE20K [12] dataset. ADE20K covers 150 semantic classes, with 20K images for  
 52 training, 2K images for testing, and 3K for testing. Following [7], UperNet [13] structure in  
 53 mmsegmentation [14] is used. For training, the AdamW optimizer with an initial learning rate of  
 54  $6 \times 10^{-5}$  and a weight decay of 0.01 is employed. The models are trained for 160K iterations  
 55 on 8 Tesla V100 GPUs. We also adopt the consistent data augmentations in mmsegmentation

<sup>1</sup><https://github.com/facebookresearch/deit>

<sup>2</sup><https://github.com/microsoft/Swin-Transformer>

<sup>3</sup><https://github.com/SwinTransformer/Swin-Transformer-Object-Detection>

56 implementation. During inference, a multi-scale testing strategy exploits [0.5, 0.75, 1.0, 1.25, 1.5,  
57 1.75]× resolutions are exploited. We report mIoU on the validation set in Table 2.

| Method  | Backbone            | Crop Size | LR Schedule | mIoU        |
|---------|---------------------|-----------|-------------|-------------|
| UperNet | DeiT-S              | 512       | 160K        | 44.0        |
| UperNet | Swin-T              | 512       | 160K        | 45.8        |
|         | <b>Swin-T w ARM</b> | 512       | 160K        | <b>46.9</b> |

Table 2: Results of semantic segmentation on ADE20K dataset. The models integrated with our proposed ARM are shown in bold font.

58 **Generalization towards Common Corruptions.** We provide detailed error rates towards different  
59 types of common corruptions on ImageNet-C. As mentioned above, transformers have demonstrated  
60 dominance against corruptions compared to CNNs. Likes anti-aliasing the CNNs in [1], anti-aliasing  
61 in vision transformers also upgrades the feature robustness. Moreover, we can find that while Swin-T  
62 has a overall lower error rate compared to anti-aliased ResNet-50, it acts poorly when dealing with  
63 certain corruptions such as JPEG-compression and pixelate. When integrated with our aliasing  
64 reduction module, the model gains a clear boost in robustness, particularly towards those corruptions  
65 that are not handled well by the original transformer architecture.

|        | Error Rate towards common corruptions on ImageNet-C |              |              |              |              |              |              |         |       |              |              |              |         |              | norm<br>mCE  |             |
|--------|-----------------------------------------------------|--------------|--------------|--------------|--------------|--------------|--------------|---------|-------|--------------|--------------|--------------|---------|--------------|--------------|-------------|
|        | Noise                                               |              |              | Blur         |              |              |              | Weather |       |              |              | Digital      |         |              |              |             |
|        | Gauss                                               | Shot         | Impulse      | Defocus      | Glass        | Motion       | Zoom         | Snow    | Frost | Fog          | Bright       | Contrast     | Elastic | Pixel        |              | Jpeg        |
| AA R50 | 63.86                                               | 66.07        | 69.15        | 58.36        | 71.70        | 60.74        | 61.58        | 66.78   | 60.29 | 54.40        | 31.48        | 58.09        | 55.26   | 53.89        | 43.62        | 73.73       |
| Swin-T | 52.46                                               | 54.42        | 54.12        | 68.31        | 83.68        | 65.52        | 72.85        | 56.91   | 52.84 | 49.02        | 47.79        | 45.50        | 75.96   | 67.03        | 64.11        | 60.7        |
| w ARM  | <b>51.17</b>                                        | <b>54.03</b> | <b>53.58</b> | <b>66.25</b> | <b>83.06</b> | <b>65.07</b> | <b>70.44</b> | 57.22   | 57.12 | <b>46.79</b> | <b>45.15</b> | <b>44.99</b> | 77.12   | <b>63.88</b> | <b>61.52</b> | <b>59.8</b> |

Table 3: Generalization towards corruptions. The error rates (lower is better) on ImageNet-C. In the first row we provide ResNet-50 with anti-aliasing in [1]. The next two rows respectively show the Swin-T’s performance, and the Swin-T with our ARM module.

## 66 D License of Dataset

67 **Datasets.** We use four datasets including ImageNet, ImageNet-C, MS COCO, and ADE 20K.

68 ImageNet <sup>4</sup>: BSD 3-Clause License.

69 ImageNet-C <sup>5</sup>: Apache-2.0 License

70 MS COCO <sup>6</sup>: Creative Commons Attribution 4.0 License

71 ADE20K <sup>7</sup>: Creative Commons BSD-3 License

## 72 References

- 73 [1] Richard Zhang. Making convolutional networks shift-invariant again. In *ICML*, 2019.
- 74 [2] Samarth Sinha, Animesh Garg, and Hugo Larochelle. Curriculum by smoothing. *NeurIPS*,  
75 2020.
- 76 [3] Domen Tabernik, Matej Kristan, and Aleš Leonardis. Spatially-adaptive filter units for deep  
77 neural networks. In *CVPR*, 2018.
- 78 [4] Jan Eric Kyprianidis and Jürgen Döllner. Image abstraction by structure adaptive filtering. In  
79 *TPCG*, 2008.
- 80 [5] Alexey Dosovitskiy, Lucas Beyer, Alexander Kolesnikov, Dirk Weissenborn, Xiaohua Zhai,  
81 Thomas Unterthiner, Mostafa Dehghani, Matthias Minderer, Georg Heigold, Sylvain Gelly,  
82 Jakob Uszkoreit, and Neil Houlsby. An image is worth 16x16 words: Transformers for image  
83 recognition at scale. In *ICLR*, 2021.

<sup>4</sup><https://www.image-net.org/>

<sup>5</sup><https://github.com/hendrycks/robustness>

<sup>6</sup><https://cocodataset.org/>

<sup>7</sup><https://groups.csail.mit.edu/vision/datasets/ADE20K/>

- 84 [6] Hugo Touvron, Matthieu Cord, Matthijs Douze, Francisco Massa, Alexandre Sablayrolles, and  
85 Hervé Jégou. Training data-efficient image transformers & distillation through attention. *arXiv*  
86 *preprint arXiv:2012.12877*, 2020.
- 87 [7] Ze Liu, Yutong Lin, Yue Cao, Han Hu, Yixuan Wei, Zheng Zhang, Stephen Lin, and Baining  
88 Guo. Swin transformer: Hierarchical vision transformer using shifted windows. *arXiv preprint*  
89 *arXiv:2103.14030*, 2021.
- 90 [8] Tsung-Yi Lin, Michael Maire, Serge Belongie, James Hays, Pietro Perona, Deva Ramanan,  
91 Piotr Dollár, and C Lawrence Zitnick. Microsoft coco: Common objects in context. In *ECCV*,  
92 2014.
- 93 [9] Kaiming He, Georgia Gkioxari, Piotr Dollár, and Ross Girshick. Mask r-cnn. In *ICCV*, 2017.
- 94 [10] Zhaowei Cai and Nuno Vasconcelos. Cascade r-cnn: Delving into high quality object detection.  
95 In *CVPR*, 2018.
- 96 [11] Kai Chen, Jiaqi Wang, Jiangmiao Pang, Yuhang Cao, Yu Xiong, Xiaoxiao Li, Shuyang Sun,  
97 Wansen Feng, Ziwei Liu, Jiarui Xu, et al. Mmdetection: Open mmlab detection toolbox and  
98 benchmark. *arXiv preprint arXiv:1906.07155*, 2019.
- 99 [12] Bolei Zhou, Hang Zhao, Xavier Puig, Tete Xiao, Sanja Fidler, Adela Barriuso, and Antonio  
100 Torralba. Semantic understanding of scenes through the ade20k dataset. *IJCV*, 2019.
- 101 [13] Tete Xiao, Yingcheng Liu, Bolei Zhou, Yuning Jiang, and Jian Sun. Unified perceptual parsing  
102 for scene understanding. In *ECCV*, 2018.
- 103 [14] MMSegmentation Contributors. MMSegmentation: Openmmlab semantic segmentation toolbox  
104 and benchmark. <https://github.com/open-mmlab/msegmentation>, 2020.

105 **Checklist**

- 106 1. For all authors...
- 107 (a) Do the main claims made in the abstract and introduction accurately reflect the paper's  
108 contributions and scope? [Yes]
- 109 (b) Did you describe the limitations of your work? [Yes]
- 110 (c) Did you discuss any potential negative societal impacts of your work? [Yes] Beyond  
111 the issue of interpretability in Section ??, another negative societal impact might arise  
112 if our method is applied to transformer-based image generation, potentially introducing  
113 more concerns about deepfakes.
- 114 (d) Have you read the ethics review guidelines and ensured that your paper conforms to  
115 them? [Yes]
- 116 2. If you are including theoretical results...
- 117 (a) Did you state the full set of assumptions of all theoretical results? [N/A]
- 118 (b) Did you include complete proofs of all theoretical results? [N/A]
- 119 3. If you ran experiments...
- 120 (a) Did you include the code, data, and instructions needed to reproduce the main experi-  
121 mental results (either in the supplemental material or as a URL)? [Yes] See Section ??,  
122 ?? and ?. Additional instructions as well as Pytorch-style pseudo-code are present in  
123 the Appendix.
- 124 (b) Did you specify all the training details (e.g., data splits, hyperparameters, how they  
125 were chosen)? [Yes]
- 126 (c) Did you report error bars (e.g., with respect to the random seed after running experi-  
127 ments multiple times)? [No] Most of our experiments are on large-scale datasets  
128 like ImageNet, which we found are not sensitive towards random seeds. It's also  
129 computational infeasible to run multiple times of the large experiments.
- 130 (d) Did you include the total amount of compute and the type of resources used (e.g., type  
131 of GPUs, internal cluster, or cloud provider)? [Yes] See Section ??
- 132 4. If you are using existing assets (e.g., code, data, models) or curating/releasing new assets...
- 133 (a) If your work uses existing assets, did you cite the creators? [Yes]
- 134 (b) Did you mention the license of the assets? [Yes] See Appendix
- 135 (c) Did you include any new assets either in the supplemental material or as a URL? [Yes]  
136 See Appendix
- 137 (d) Did you discuss whether and how consent was obtained from people whose data you're  
138 using/curating? [Yes]
- 139 (e) Did you discuss whether the data you are using/curating contains personally identifiable  
140 information or offensive content? [N/A]
- 141 5. If you used crowdsourcing or conducted research with human subjects...
- 142 (a) Did you include the full text of instructions given to participants and screenshots, if  
143 applicable? [N/A]
- 144 (b) Did you describe any potential participant risks, with links to Institutional Review  
145 Board (IRB) approvals, if applicable? [N/A]
- 146 (c) Did you include the estimated hourly wage paid to participants and the total amount  
147 spent on participant compensation? [N/A]
